# Supplementary material
Source: publisher site journal article supplement (https://www.spandidos-publications.com/3116/downloadSupplementary)

Figure S1. *COL6A1* expression in NMIBC tissues. *COL6A1* mRNA expression was measured using reverse transcription-quantitative PCR, and results showed that *COL6A1* expression was downregulated in patients with NMIBC with stage T1 disease than that in patients with stage Ta disease. Box plots represent the minimum score, first (lower) quartile, median, third (upper) quartile and maximum score. P-value was calculated using the Mann-Whitney U test. \*P<0.05. NMIBC, non-muscle invasive bladder cancer; COL6A1, collagen type VI- $\alpha$ 1; Ln, natural logarithm.

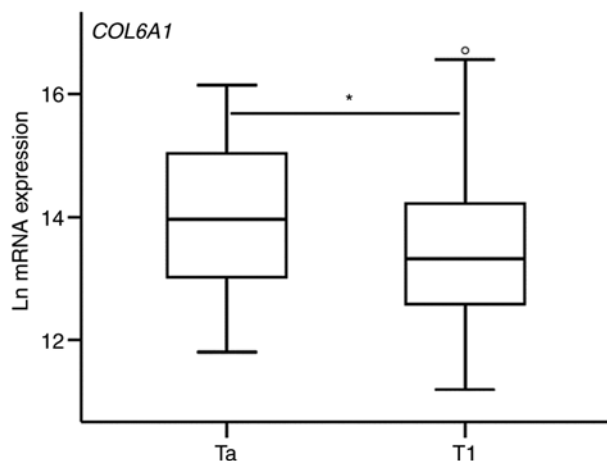

Figure S2. Protein-protein interaction network analyzed using the Search Tool for the Retrieval of Interacting Genes/Proteins. Different colored lines represent types of evidence for association: Light blue, database evidence; purple, experimental evidence; green, neighborhood evidence; red, fusion evidence; blue, co-occurrence evidence; yellow, text-mining evidence; black, co-expression evidence; and gray, protein homology evidence. Different colored nodes represent different biological processes: Green, extracellular matrix organization (FDR, 0.0002); yellow, positive regulation of cell migration (FDR, 0.00047); purple, negative regulation of apoptotic signaling (FDR, 0.0011) and KEGG pathways; red, pathways involved in bladder cancer (FDR,  $6.93 \times 10^{-6}$ ); and blue, pathways involved in cancer (FDR, 0.00012). FDR, false discovery rate; COL6A1/2, collagen type VI- $\alpha$ 1/2; MMP, matrix metalloproteinase; IL, interleukin.

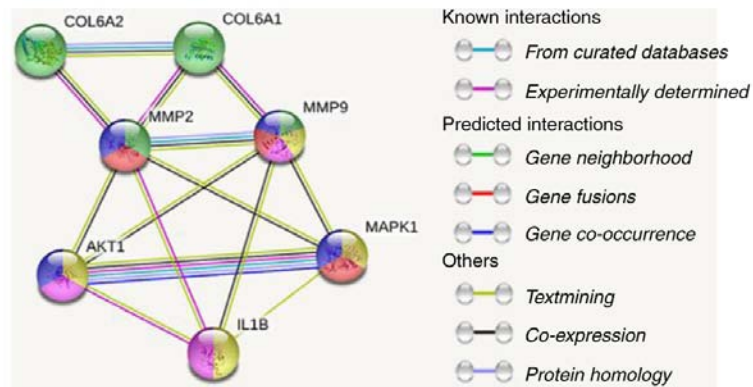

Supplement: Supplementary file 1 [file downloadSupplementary]
